# Supplementary material for: Nanostructured Co-doped BiVO4 for efficient and sustainable photoelectrochemical chlorine evolution from simulated sea-water
Source: Royal Society of Chemistry journal article supplement (doi:10.1039/d2dt03369k), 2023-01-01
Supplement: d2dt03369k1.pdf [file d2dt03369k1.pdf]

## Nanostructured Co/BiVO<sub>4</sub> for Efficient and Sustainable Photoelectrochemical Chlorine Evolution from Simulated Sea-Water

Inderjeet Chauhan,<sup>a,b</sup> Kshirodra Kumar Patra,<sup>a</sup> Himanshu Bajpai,<sup>a,b</sup> Nitin B. Mhamane,<sup>a,b</sup> Kranti N. Salgaonkar,<sup>a,b</sup> and Chinnakonda S. Gopinath<sup>a,b,\*</sup>

### Electronic Supplementary Information (ESI)

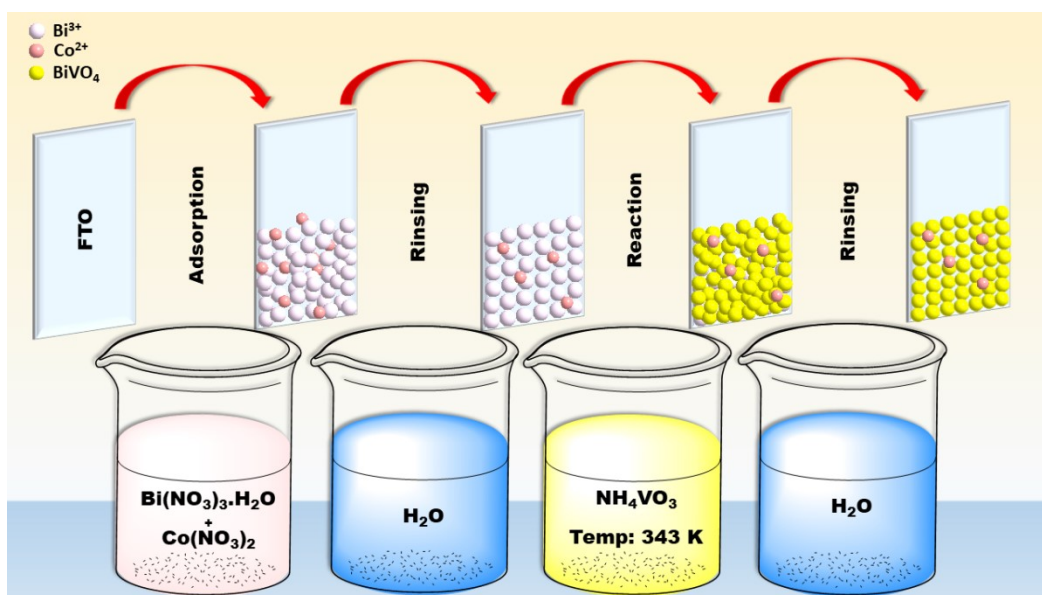

Figure S1: Schematic diagram of fabrication of photoanode by SILAR method.

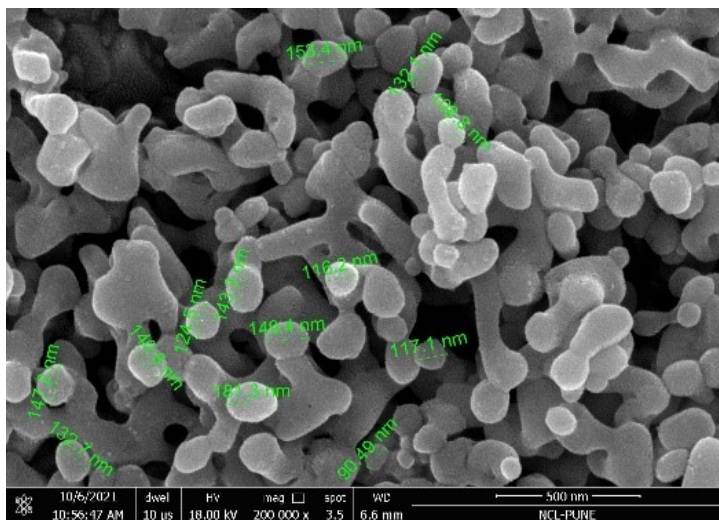

Figure S2: FESEM image of 0.05 Co-BV.

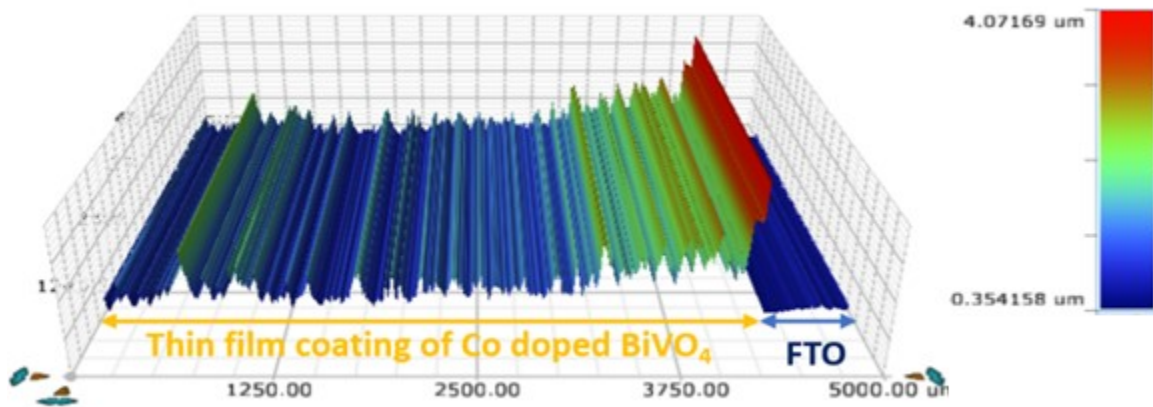

Figure S3: The surface roughness and thickness of 0.05 Co-BV.

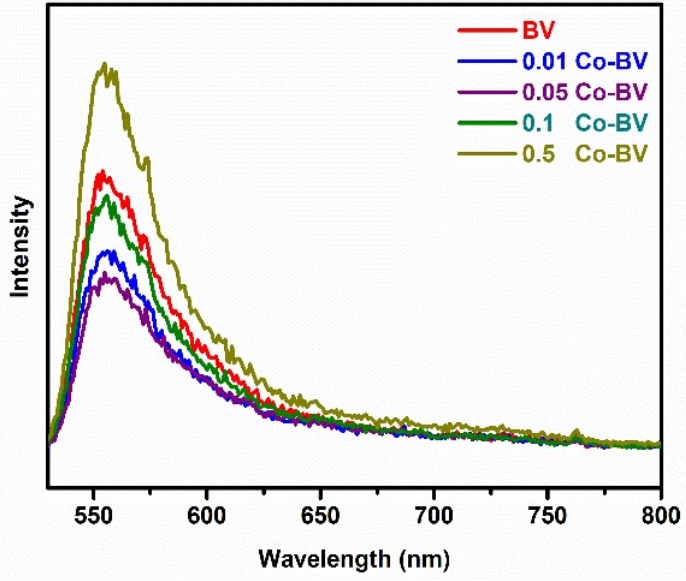

Figure S4: The photoluminescence spectra of the pristine BV and all doped sample.

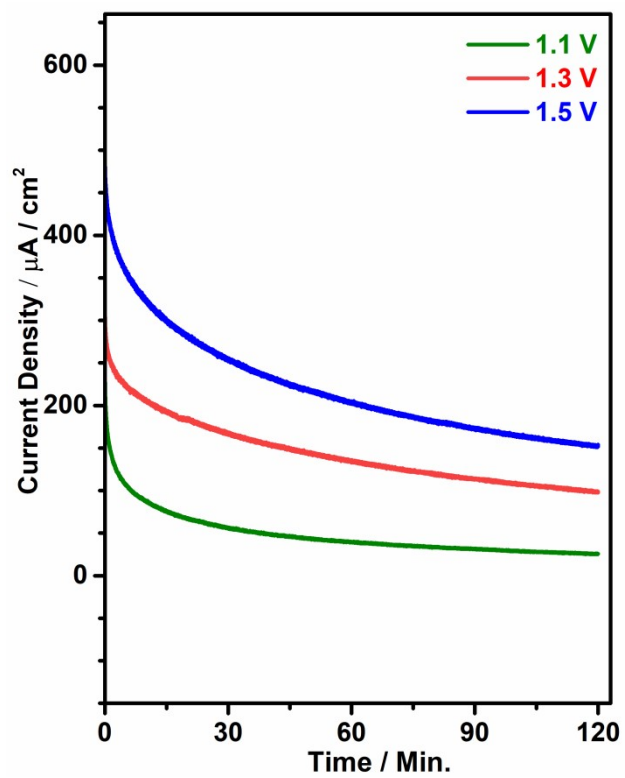

Figure S5: The chronoamperometry data of the 0.05 Co-BV at 1.1, 1.3 and 1.5 V Vs. RHE.

Table S1: Co-content determined from ICP analysis

| Photo-electrocatalyst | ICP-(mol %) |
|-----------------------|-------------|
| 0.01 Co-BV            | 0.011       |
| 0.05 Co-BV            | 0.052       |
| 0.1 Co-BV             | 0.104       |
| 0.5 Co-BV             | 0.486       |

Table S2: Lifetime decay of BV and 0.05 Co-BV.

| Catalyst   | Lifetime (ns)    | CHISQ ( $\chi^2$ ) values |
|------------|------------------|---------------------------|
| BV         | $\tau_1 = 0.248$ | 1.12                      |
|            | $\tau_2 = 3.61$  |                           |
| 0.05 Co-BV | $\tau_1 = 0.59$  | 1.15                      |
|            | $\tau_2 = 4.05$  |                           |
